# Supplementary material
Source: PubMed Central journal article supplement (PMC6956258)
Supplement: Supplementary_Data.pdf [file Supplementary_Data.pdf]

Table SI. Detailed results for each mouse in the open-field test.

| A, Number of crossings |         |             |                                    |                                    |                                    |
|------------------------|---------|-------------|------------------------------------|------------------------------------|------------------------------------|
| Mouse                  | Control | Scopolamine | 0.5 mg/kg 6-bro A +<br>scopolamine | 1.5 mg/kg 6-bro A +<br>scopolamine | 5.0 mg/kg 6-bro A +<br>scopolamine |
| 1                      | 85      | 36          | 90                                 | 99                                 | 103                                |
| 2                      | 56      | 40          | 93                                 | 84                                 | 118                                |
| 3                      | 66      | 56          | 21                                 | 88                                 | 83                                 |
| 4                      | 61      | 77          | 80                                 | 106                                | 52                                 |
| 5                      | 66      | 143         | 84                                 | 91                                 | 67                                 |
| 6                      | 58      | 104         | 121                                | 66                                 | 92                                 |
| 7                      | 69      | 89          | 72                                 | 80                                 | 91                                 |
| 8                      | 66      | 87          | 86                                 | 82                                 | 82                                 |

## B, Number of rearings

| Mouse | Control | Scopolamine | 0.5 mg/kg 6-bro A +<br>scopolamine | 1.5 mg/kg 6-bro A +<br>scopolamine | 5.0 mg/kg 6-bro A +<br>scopolamine |
|-------|---------|-------------|------------------------------------|------------------------------------|------------------------------------|
| 1     | 61      | 59          | 31                                 | 38                                 | 57                                 |
| 2     | 55      | 43          | 41                                 | 43                                 | 28                                 |
| 3     | 43      | 30          | 21                                 | 52                                 | 32                                 |
| 4     | 29      | 52          | 27                                 | 22                                 | 35                                 |
| 5     | 31      | 38          | 64                                 | 63                                 | 54                                 |
| 6     | 16      | 44          | 38                                 | 24                                 | 46                                 |
| 7     | 29      | 50          | 77                                 | 43                                 | 29                                 |
| 8     | 48      | 28          | 41                                 | 17                                 | 48                                 |

6-bro A, 6-bromotryptamine A.

Table SII. Detailed results for each mouse in the novel object recognition tests.

| Mouse                         | Control  | Scopolamine | 0.5 mg/kg 6-bro A +<br>scopolamine | 1.5 mg/kg 6-bro A +<br>scopolamine | 5.0 mg/kg 6-bro A +<br>scopolamine |
|-------------------------------|----------|-------------|------------------------------------|------------------------------------|------------------------------------|
| A, Day 1 (recognition index)  |          |             |                                    |                                    |                                    |
| 1                             | 43.80692 | 45.17914    | 48.60028                           | 51.08413                           | 50.50034                           |
| 2                             | 52.41179 | 45.98489    | 53.57143                           | 36.61194                           | 60.0982                            |
| 3                             | 43.99665 | 61.67097    | 40.31791                           | 50.0511                            | 46.52129                           |
| 4                             | 42.23495 | 55.97349    | 44.96392                           | 57.85494                           | 53.97631                           |
| 5                             | 46.00468 | 45.4361     | 56.00919                           | 71.95513                           | 43.95078                           |
| 6                             | 55.16734 | 48.93539    | 58.45411                           | 57.00935                           | 45.45707                           |
| 7                             | 57.34746 | 43.92744    | 49.03117                           | 31.97241                           | 42.67097                           |
| 8                             | 62.00473 | 39.11043    | 43.99038                           | 37.70764                           | 51.6104                            |
| B, Day 2 (recognition index)  |          |             |                                    |                                    |                                    |
| 1                             | 43.80692 | 45.17914    | 48.60028                           | 51.08413                           | 50.50034                           |
| 1                             | 63.03154 | 55.98686    | 68.07797                           | 74.19107                           | 54.79557                           |
| 2                             | 65.097   | 48.6711     | 39.30818                           | 64.44291                           | 58.0982                            |
| 3                             | 58.96672 | 45.94271    | 57.57576                           | 67.80019                           | 81.86404                           |
| 4                             | 66.42027 | 51.77305    | 61.39397                           | 56.56371                           | 78.56342                           |
| 5                             | 60.01087 | 64.28571    | 65.8503                            | 59.87495                           | 56.4006                            |
| 6                             | 66.44482 | 47.22357    | 58.53614                           | 66.36109                           | 58.09576                           |
| 7                             | 70.05095 | 52.79105    | 71.10147                           | 64.35644                           | 67.1671                            |
| 8                             | 73.93404 | 49.82826    | 57.79363                           | 59.39344                           | 58.33206                           |
| 6-bro A, 6-bromotryptamine A. |          |             |                                    |                                    |                                    |

Table SIII. Detailed results for each mouse in Morris water maze tests.

| A, Escape latency in 4 days of training (sec) |              |       |       |       |       |       |       |       |
|-----------------------------------------------|--------------|-------|-------|-------|-------|-------|-------|-------|
| Mice                                          | Training day |       |       |       |       |       |       |       |
|                                               | 1            | 2     | 3     | 4     | 5     | 6     | 7     | 8     |
| Control group                                 |              |       |       |       |       |       |       |       |
| 1                                             | 73           | 90    | 60    | 72    | 59    | 76    | 68    | 66.24 |
| 2                                             | 44           | 73    | 61    | 39.36 | 53.12 | 40    | 75    | 80    |
| 3                                             | 76           | 56.36 | 33    | 59.79 | 26.67 | 41.08 | 63    | 64    |
| 4                                             | 27           | 46.77 | 48.27 | 60.52 | 18.44 | 40    | 34    | 30.32 |
| Scopolamine group                             |              |       |       |       |       |       |       |       |
| 1                                             | 85           | 59    | 90    | 51    | 90    | 82    | 70    | 55    |
| 2                                             | 72           | 39    | 90    | 90    | 90    | 52.4  | 71    | 61    |
| 3                                             | 50.03        | 90    | 30.75 | 90    | 57.78 | 90    | 39.02 | 90    |
| 4                                             | 22.67        | 79.05 | 21.96 | 90    | 42.61 | 90    | 62.04 | 90    |
| 0.5 mg/kg 6-bro A + Scopolamine               |              |       |       |       |       |       |       |       |
| 1                                             | 90           | 90    | 56    | 90    | 88    | 90    | 39.76 | 52    |
| 2                                             | 74           | 90    | 90    | 90    | 8.52  | 90    | 11.08 | 90    |
| 3                                             | 54           | 90    | 57.96 | 72.72 | 25.84 | 49    | 90    | 90    |
| 4                                             | 14.48        | 65.8  | 90    | 90    | 30    | 90    | 19.68 | 78    |
| 1.5 mg/kg 6-bro A + Scopolamine               |              |       |       |       |       |       |       |       |
| 1                                             | 90           | 22.8  | 90    | 90    | 60.72 | 90    | 51.04 | 64.04 |
| 2                                             | 82           | 90    | 90    | 62    | 22    | 68.6  | 41.96 | 60.16 |
| 3                                             | 47           | 53    | 90    | 64    | 13    | 23    | 90    | 90    |
| 4                                             | 90           | 35    | 15.12 | 13    | 19.12 | 90    | 90    | 76.92 |
| 5.0 mg/kg 6-bro A + Scopolamine               |              |       |       |       |       |       |       |       |
| 1                                             | 90           | 30    | 84    | 31    | 90    | 90    | 71    | 66    |
| 2                                             | 69           | 87.4  | 82    | 34    | 57    | 90    | 34    | 41    |
| 3                                             | 90           | 50.55 | 77    | 53.76 | 46.56 | 49    | 52    | 44    |
| 4                                             | 90           | 66    | 70    | 35.81 | 57.47 | 74    | 57    | 28    |

## B, Swimming time in the target quadrant in day 5 (sec)

| Mouse | Control | Scopolamine | 0.5 mg/kg 6-bro A +<br>Scopolamine | 1.5 mg/kg 6-bro A +<br>Scopolamine | 5.0 mg/kg 6-bro A +<br>Scopolamine |
|-------|---------|-------------|------------------------------------|------------------------------------|------------------------------------|
| 1     | 22.72   | 22.72       | 26.68                              | 29.96                              | 31.6                               |
| 2     | 38.8    | 18.36       | 27.36                              | 31.4                               | 23                                 |
| 3     | 26.68   | 16.12       | 16.04                              | 28.4                               | 27.24                              |
| 4     | 33.28   | 21.68       | 27.28                              | 23.56                              | 36.6                               |
| 5     | 24.92   | 17.64       | 25.8                               | 22.24                              | 24.6                               |
| 6     | 30.48   | 19.32       | 23.8                               | 30.08                              | 27.2                               |
| 7     | 29.64   | 21.44       | 27                                 | 22.46                              | 36.2                               |
| 8     | 24.48   | 20.68       | 21.2                               | 23.48                              | 23.72                              |

6-bro A: 6-bromotryptamine A.
